# Supplementary material for: Microbial megacities fueled by methane oxidation in a mineral spring cave
Source: PubMed Central journal article supplement — ISME J. 2017 Sep 26;12(1):87–100. doi: 10.1038/ismej.2017.146 (PMC5739006; doi:10.1038/ismej.2017.146), 2017-09-26
Supplement: ismej2017146x1.pdf [file ismej2017146x1.pdf]

1 **Microbial megacities fueled by methane oxidation in a mineral**  
2 **spring cave**

3

4 Clemens Karwautz<sup>1</sup>, Günter Kus<sup>2</sup>, Michael Stöckl<sup>1</sup>, Thomas R. Neu<sup>3</sup>, Tillmann Lueders<sup>1</sup>

5

6 Author affiliations:

7 <sup>1</sup>Institute of Groundwater Ecology, Helmholtz Zentrum München—German Research Centre for  
8 Environmental Health, Neuherberg, Germany

9 <sup>2</sup>Bavarian Environment Agency (LfU), Dept. 10: Geological Survey, Hof/Saale Germany

10 <sup>3</sup>Department of River Ecology, Helmholtz Centre for Environmental Research-UFZ, Magdeburg,  
11 Germany

12

13 Correspondence: T Lueders, Institute of Groundwater Ecology, Helmholtz Zentrum München,  
14 Ingolstädter Landstrasse 1, Neuherberg, 85764, Germany. E-mail: [tillmann.lueders@helmholtz-  
muenchen.de](mailto:tillmann.lueders@helmholtz-<br/>15 muenchen.de)

16

17 **Supporting Information (SI)**

|    |                                            |           |
|----|--------------------------------------------|-----------|
| 18 | <b>SUPPLEMENTARY MATERIALS AND METHODS</b> | <b>2</b>  |
| 19 | <b>SUPPLEMENTARY REFERENCES</b>            | <b>7</b>  |
| 20 | <b>SUPPLEMENTARY TABLES</b>                | <b>10</b> |
| 21 | <b>SUPPLEMENTARY FIGURE</b>                | <b>12</b> |

22

23

## 24 **Supplementary Materials and Methods**

### 25 *Water sample analysis*

26 Water for analysis of dissolved organic carbon (DOC) and ion chromatography was filtered through  
27 0.45  $\mu$  m syringe driven filter units (Merck Millipore, Germany) and stored at 4° C in sterile,  
28 pretreated (soaked overnight in bidest water) glassware containing no residual carbon, or collected in  
29 polystyrene vials for ion chromatography (IC).

30 DOC samples that were not analyzed immediately were acidified using 1M HCl (< pH 2). DOC was  
31 analyzed using high temperature combustion with infrared detection of CO<sub>2</sub> on a TOC-V  
32 (Shimadzu, Japan) with an ASI-V autosampler having a detection limit of 0.1 mg L<sup>-1</sup>. Major cations  
33 (calcium, magnesium, potassium, ammonium, sodium) and anions (nitrite, nitrate, chloride, bromide,  
34 sulfate) were measured on a DX-100 (Dionex, USA) ion chromatograph equipped with a CS12 and  
35 AS14A Ion Pac columns (Faye *et al.*, 2005, Stoewer *et al.*, 2015) equipped with an AS40 auto-sampler.

### 36 *Gas sample analysis*

37 Methane concentrations were determined on a gas chromatograph (SRI Instruments, USA) equipped  
38 with a helium ionization detector and a thermal conductivity detector. A 250  $\mu$ l gas sample was  
39 manually injected into a HayeSep D column (80-100 mesh, 6 m 1/8", SRI Instruments, USA) which  
40 was kept at 50 °C. Measuring time was 4 min, which allowed the recording of nitrogen, methane and  
41 carbon dioxide. For quantification, a 5-point standard curve (100000 – 1000 ppm) was generated ( $R^2$   
42 = 0.98, n = 3) using mixtures of N<sub>2</sub>, CH<sub>4</sub>, and CO<sub>2</sub> (all gases Linde, Germany).

43 Compound specific isotope ratios were measured using a TRACE GC Ultra (Thermo Fisher  
44 Scientific; Italy), coupled to a Finnigan MAT 253 IRMS (Thermo Fisher Scientific, Germany)  
45 connected by a Finnigan GC Combustion III Interface as previously described (Bergmann *et al.*,

46 2011). The combustion oven temperature was 980 °C for carbon isotope analysis, while for hydrogen  
47 isotopes a pyrolytic interface was used (1390 °C). The GC was equipped with a programmable  
48 temperature vaporizer (PTV) injector (Optic3, ATAS GL International B.V.; Netherlands) heated to  
49 100 °C. For isotope analysis of methane, the GC was equipped with a RT-QPLOT capillary column  
50 (30m x 0.32, Restek, USA) connected to fused-silica pre- and postcolumns (FS-Methyl-Sil, 2 m x 0.32  
51 mm and 1 m x 0.32 mm, respectively; CS Chromatographie Service GmbH, Germany). For carbon  
52 analysis, carrier gas flow was set to 1.4 mL min<sup>-1</sup> and a 100 µl sample was injected for each  
53 measurement making three measurements per run (800 s). Gas samples were injected by hand into  
54 the heated (100 °C) injection port. Oxidation of carbon was achieved at 980 °C. For hydrogen  
55 isotope analysis, the same settings and columns were used but carrier gas flow was set to 1.2 mL min<sup>-1</sup>  
56 and 500 µl was injected for each measurement. The GC-oven was programmed to permanently  
57 hold at 40 °C.

#### 58 *Biofilm stable isotopes*

59 Isotope analysis of biofilm samples was carried out on an elemental analyzer (EA; Euro Vector SPA,  
60 Italy) coupled with a combustion unit (Hekatech, Germany) connected to a Finnegan Mat 253  
61 isotope-ratio mass spectrometer (IRMS; Thermo Fisher Scientific, Germany) to assess the carbon  
62 and nitrogen isotopic signature. Samples were lyophilized by means of freeze-drying and then ground  
63 to powder, which was weighted into tin capsules for analysis. The temperature of the oxidation tube  
64 in the EA was 1000 °C and the temperature of the reduction tube was 600 °C. The temperature of  
65 the combustion tube was 1480 °C. For calibration, three different standards were analyzed in  
66 triplicate before and after the analysis of the samples. Standards used for δ<sup>13</sup>C and δ<sup>15</sup>N calibration  
67 were caffeine (IAEA-600) and l- glutamic acid (USGS-40 and USGS-41). In addition, a caffeine  
68 standard was analyzed after every seventh sample to calibrate shifts in the measurements.

69 *Elemental composition of biofilms*

70 Freeze-dried sample material was extracted by means of ashing under pressure at 170 °C in a Seif  
71 device with HNO<sub>3</sub> (Schramel 2012) respectively with tetramethyl ammonium hydroxide (TMAH)  
72 (Schramel and Hasse 1994) for the determination of iodine. Elements in the extracts were  
73 determined using inductively coupled plasma optical emission spectrometry (ICP-OES) (Michalke  
74 and Witte 2015). Iodine content in the water samples was measured equally by adding TMAH and  
75 using ICP-OES or ICP-MS according to ISO 17294.

76 *DNA Extraction*

77 Biofilms were disrupted (Cury and Koo 2007) and DNA was extracted from replicate samples  
78 following the routine of Pilloni *et al.*, (2012). Briefly, the frozen biofilms were suspended in 1x PBS  
79 buffer and pretreated by repetitive (3x) sonication (35 kHz, Sonorex RK102; Bandelin Electronic  
80 GmbH & Co, Germany), shaking and spinning (5500 g for 10 min at 4 °C) to interrupt the  
81 extracellular matrix. The cell slurry and filters from the water samples were suspended in 650 µl PTN  
82 buffer (120 mM Na<sub>2</sub>HPO<sub>4</sub>, 125 mM Tris, 0.25 mM NaCl, pH 8) and incubated at 37°C for 15 min  
83 with 40 µl lysozyme (50 mg ml<sup>-1</sup> in TE) and 10 µl proteinase K (10 mg ml<sup>-1</sup> in TE). After the addition  
84 of 150 µl SDS (20% (wt/v) sodium dodecyl sulfate, 1.6 M NaCl), the incubation was continued for  
85 15 min at 65°C with shaking at 500 rpm. The sediments were bead beaten (45 s at 6 ms<sup>-1</sup> in a  
86 FastPrep-24 (MP Biomedicals, USA)) with, 0.2 ml of zirconia-silica beads (1:1 mix of 0.1- and 0.7-  
87 mm diameter; Roth, Germany) and 100 µl of phenol- chloroform-isoamyl alcohol (25:24:1) in 2-ml  
88 screw-cap vials. This was followed by an additional bead beating step (20 sec 6.5 ms<sup>-1</sup>). Afterwards  
89 nucleic acids were sequentially purified by extraction with 1 volume of phenol-chloroform-isoamyl  
90 alcohol (25:24:1) and 1 volume of chloroform-isoamyl alcohol (24:1). The purified nucleic acid was  
91 then precipitated with 2 volumes of 30% polyethylene glycol by incubation at 4°C for 12 h and  
92 subsequently centrifuged at 20,000 g and 20°C for 30 min. All used chemicals were from Sigma-

93 Aldrich (USA), if not otherwise stated. For each biological sample, two parallel extractions were  
94 pooled and stored at -20°C until further analysis.

#### 95 *Molecular analyses*

96 PCR for 16S rRNA and functional gene amplification was performed in a Mastercycler ep gradient  
97 (Eppendorf, Germany). The PCR reactions for 16S rRNA amplification were set up with the  
98 following cycling conditions: initial denaturation (94°C, 5 min), followed by 28 cycles of denaturation  
99 (94°C, 30 s), annealing (52°C, 30 s) and elongation (70°C, 60 s). Each 50 µl PCR reaction contained  
100 1x PCR buffer, 1.5 mM MgCl<sub>2</sub>, 0.1 mM dNTPs, 1.25 U recombinant Taq polymerase (Fermentas,  
101 Germany), 0.2 mg ml<sup>-1</sup> bovine serum albumin, 0.3 mM of each specific forward and reverse primer  
102 (Biomers, Germany) and 1 µl of template DNA. Amplification reactions for the functional marker  
103 genes *mxnF* ( $\alpha$  subunit of the methanol dehydrogenase), *mmoX* ( $\alpha$  subunit of the hydroxylase  
104 component of the soluble methane monooxygenase) and *pmoA* ( $\alpha$  subunit of the particulate  
105 methane monooxygenase) differed in using higher annealing and elongation temperatures (55 and 72  
106 °C , respectively) as well as longer annealing times (*mxnF* and *mmoX*: 60 sec, *pmoA*: 90 sec) as  
107 originally recommended (Costello and Lidstrom 1999, Dumont and Murrell 2005, Horz *et al.*, 2001).  
108 Products were verified on an agarose gel, and all samples were purified using PCRExtract mini kit  
109 columns according to the manufacturers protocol (5prime, Germany).

110 Community fingerprinting of the 16S rRNA gene and the *pmoA* gene was done via terminal  
111 restriction fragment length polymorphism (TRFLP). The respective primers were fluorescently  
112 labeled with FAM (Carboxyfluorescein) and purified PCR products (80 ng µl<sup>-1</sup>) by adding 0.3 µL  
113 restriction enzymes (*MspI* 10 units µL<sup>-1</sup>) and 1 µL buffer (all Thermo Fisher, USA) and incubating the  
114 mixture for 2h at 37 °C. Fragments were subsequently desalted with DyeEx 2.0 Spin Kit columns  
115 (QIAGEN, Germany). Aliquots of 1 and 3 µL were combined with a mixture of high definition  
116 formamide and 6-carboxy-X-rhodamine-labeled MapMarker 1000 ladder (BioVentures, USA) in a

117 1:400 dilution. Fragments were denatured at 95 °C for 5 min and stored in the fridge (4 °C) until  
118 fragment analysis. Automated fragment electrophoresis was performed at the genome analysis center  
119 (Helmholtz Zentrum München), where fragments were separated by capillary electrophoresis on an  
120 ABI 3730 DNA analyzer (Applied Biosystems, Germany). Electrophoresis was executed with POP-7  
121 polymer in a 50 cm capillary array under the following conditions: 10 s injection time, 2 kV injection  
122 voltage, 7 kV run voltage, 66 °C run temperature and 63 min analysis time.

123 The electropherograms were then evaluated with the Gene Mapper 5.1 software (Applied  
124 Biosystems, Germany) and T-RFLP data was analyzed with the online T-RF analysis software T-  
125 REX (Culman *et al.*, 2009). Background noise filtering (Abdo *et al.*, 2006) selected peaks with a height  
126 >1 standard deviation of all peaks and the clustering threshold for aligning peaks across the samples  
127 was set to 2, binning all peaks within two bp. Relative T-RF abundance was inferred from peak  
128 heights. For reduction of data complexity, T-RFs that occurred in less than 5 % of the samples were  
129 excluded from further analysis.

130 Barcoded amplicons were generated for forward and reverse reads. Primers were fused with A or B  
131 adapters (for forward and reverse discrimination) and multiplex barcode identifiers (MID). PCR  
132 products were purified with the Agencourt AMPure magnetic beads (Beckman Coulter, Germany) as  
133 specified by the manufacturers. After the first purification a second purification step was necessary to  
134 guarantee the removal of all short fragments. Furthermore, each amplicon was checked for primer  
135 dimer contamination and correct fragment size using the Bioanalyzer2100 (Agilent, USA) by loading  
136 High Sensitivity DNA assay chips (Agilent, USA), as described by the manufacturer. Amplicons  
137 generated with barcoded primers (pyrotag PCR) were quantified by the Quant-iT PicoGreen dsDNA  
138 quantification kit (Life Technologies, USA) and pooled in an equimolar ratio of  $10^9$  molecules  $\text{ml}^{-1}$ .  
139 Emulsion PCR, emulsion breaking and sequencing were performed applying the GS FLX Titanium  
140 chemistry following supplier protocols (Roche 2013).

141 Quantitative PCR was applied for 16S rRNA genes on a Stratagene MX3000P qPCR cycler (Agilent,  
142 USA). Gene copy numbers per DNA extract were measured for three dilutions in triplicate. Dilution  
143 factors were  $1 \times 10^0$ ,  $1 \times 10^{-1}$  and  $1 \times 10^{-2}$ . Quantitative PCR was performed using the PCR settings  
144 described above while also adding the fluorescent dyes SybrGreen (0.25  $\mu$ l 1/500) for DNA  
145 detection and ROX (0.75  $\mu$ l 1/500) (both Life Technologies, USA) for equilibration and adding 2  $\mu$ l  
146 sample instead of 1  $\mu$ l. Quantitative PCR was performed at an initial denaturation temperature of 94  
147  $^{\circ}$  C (3 min) followed by 40 cycles of denaturation (94  $^{\circ}$  C, 30 s), annealing (52  $^{\circ}$ C, 30 s) and  
148 elongation (70  $^{\circ}$ C 30 s), and subsequent denaturation (95  $^{\circ}$ C, 1 min), reassociation (55  $^{\circ}$ C, 30 s) and a  
149 dissociation ramp (55  $^{\circ}$ C to 95  $^{\circ}$ C, 30 min). The specificity of the PCR products was verified by  
150 melting curve analysis. A full length 16S rRNA of *Azoarcus* sp. strain T, with a known  
151 concentration, was used in a dilution series between  $1 \times 10^7$  and  $1 \times 10^1$  molecules per  $\mu$ l as a standard  
152 curve to convert measured threshold cycles to rRNA gene copy numbers (Kunapuli *et al.*, 2007).

153

## 154 **Supplementary References**

155 Abdo Z, Schuette UME, Bent SJ, Williams CJ, Forney LJ, Joyce P (2006). Statistical methods for  
156 characterizing diversity of microbial communities by analysis of terminal restriction fragment length  
157 polymorphisms of 16S rRNA genes. *Environ Microbiol* **8**: 929-938.

158 Amann R, Stromley J, Devereux R, Key R, Stahl D (1992). Molecular and microscopic identification  
159 of sulfate-reducing bacteria in multispecies biofilms. *Appl Environ Microbiol* **58**: 614-623.

160 Bergmann FD, Abu Laban NM, Meyer AH, Elsner M, Meckenstock RU (2011). Dual (C, H) isotope  
161 fractionation in anaerobic low molecular weight (poly) aromatic hydrocarbon (PAH) degradation:  
162 potential for field studies and mechanistic implications. *Environ Sci Technol* **45**: 6947-6953.

163 Costello AM, Lidstrom ME (1999). Molecular characterization of functional and phylogenetic genes  
164 from natural populations of methanotrophs in lake sediments. *Appl Environ Microbiol* **65**: 5066-5074.

- 165 Culman S, Bukowski R, Gauch H, Cadillo-Quiroz H, Buckley D (2009). T-REX: software for the  
166 processing and analysis of T-RFLP data. *BMC Bioinformatics* **10**: 171.
- 167 Cury JA, Koo H (2007). Extraction and purification of total RNA from *Streptococcus mutans* biofilms.  
168 *Anal Biochem* **365**: 208-214.
- 169 Dumont MG, Murrell JC (2005). Community - level analysis: Key genes of aerobic methane  
170 oxidation. *Methods Enzymol* **397**: 413-427.
- 171 Faye S, Maloszewski P, Stichler W, Trimborn P, Cissé Faye S, Bécaye Gaye C (2005). Groundwater  
172 salinization in the Saloum (Senegal) delta aquifer: minor elements and isotopic indicators. *Science of*  
173 *The Total Environment* **343**: 243-259.
- 174 Holmes AJ, Costello A, Lidstrom ME, Murrell JC (1995). Evidence that participate methane  
175 monooxygenase and ammonia monooxygenase may be evolutionarily related. *FEMS Microbiol Lett*  
176 **132**: 203-208.
- 177 Horz HP, Yimga MT, Liesack W (2001). Detection of methanotroph diversity on roots of  
178 submerged rice plants by molecular retrieval of *pmoA*, *mmoX*, *mxalF*, and 16S rRNA and ribosomal  
179 DNA, including *pmoA*-based terminal restriction fragment length polymorphism profiling. *Appl*  
180 *Environ Microbiol* **67**: 4177-4185.
- 181 Kunapuli U, Lueders T, Meckenstock RU (2007). The use of stable isotope probing to identify key  
182 iron-reducing microorganisms involved in anaerobic benzene degradation. *ISME J* **1**: 643-653.
- 183 Lane D (1991). 16S/23S rRNA sequencing. In: Stackebrandt E, Goodfellow M (eds). *Nucleic acid*  
184 *techniques in bacterial systematics*. John Wiley & Sons: New York. pp 125-175.
- 185 McDonald I, Kenna E, Murrell J (1995). Detection of methanotrophic bacteria in environmental  
186 samples with the PCR. *Appl Environ Microbiol* **61**: 116-121.
- 187 Michalke B, Witte H (2015). Characterization of a rapid and reliable method for iodide  
188 biomonitoring in serum and urine based on ion chromatography–ICP-mass spectrometry. *J Trace*  
189 *Elem Med Biol* **29**: 63-68.
- 190 Piloni G, Granitsiotis MS, Engel M, Lueders T (2012). Testing the limits of 454 pyrotag sequencing:  
191 reproducibility, quantitative assessment and comparison to T-RFLP fingerprinting of aquifer  
192 microbes. *PLoS One* **7**: e40467.



- 193 Roche (2013). Amplicon Library Preparation Manual 454 Life Sciences Corp.: Branford, CT 06405,  
194 USA. p 12.
- 195 Schramel P, Hasse S (1994). Iodine determination in biological materials by ICP-MS. *Microchim Acta*  
196 **116**: 205-209.
- 197 Schramel P (2012). Aufschlussverfahren zur Bestimmung von Metallen in biologischem Material  
198 [Biomonitoring Methods in German language, 2002]. *The MAK Collection for Occupational Health and*  
199 *Safety*. pp 280-320.
- 200 Stoewer MM, Knöller K, Stumpp C (2015). Tracing freshwater nitrate sources in pre-alpine  
201 groundwater catchments using environmental tracers. *J Hydrol* **524**: 753-767.
- 202 Suzuki MT, Giovannoni SJ (1996). Bias caused by template annealing in the amplification of  
203 mixtures of 16S rRNA genes by PCR. *Appl Environ Microbiol* **62**: 625-630.  
204  
205

206 **Supplementary Tables**

207

208 **Table S1.** Primers and Restriction enzymes

| Primer name | Sequence 5'→3'              | Target gene | Reference                       |
|-------------|-----------------------------|-------------|---------------------------------|
| 27f*†       | AGA GTT TGA TCM TGG CTC AG  | 16S rRNA    | Suzuki and Giovannoni (1996)    |
| 519r†       | TAT TAC CGC GGC KGC TG      | 16S rRNA    | Lane (1991)                     |
| 907r        | CCG TCA ATT CCT TTG AGT TT  | 16S rRNA    | Amann <i>et al.</i> , (1992)    |
| A189f*      | GGN GAC TGG GAC TTC TGG     | <i>pmoA</i> | Holmes <i>et al.</i> , (1995)   |
| mb661       | CCG GMG CAA CGT CYT TAC C   | <i>pmoA</i> | Costello and Lidstrom (1999)    |
| mxaf1003    | GCG GCA CCA ACT GGG GCT GGT | <i>mxaf</i> | McDonald <i>et al.</i> , (1995) |
| mxar1561    | GGG CAG CAT GAA GGG CTC CC  | <i>mxaf</i> | McDonald <i>et al.</i> , (1995) |
| mmoX534f    | CCG CTG TGG AAG GGC ATG AA  | <i>mmoX</i> | Horz <i>et al.</i> , (2001)     |
| mmoX1393r   | CCG CTG TGG AAG GGC ATG AA  | <i>mmoX</i> | Horz <i>et al.</i> , (2001)     |

209 \* these primers were FAM labeled for T-RF fingerprint analysis

210 † these primer were used for qPCR and sequencing, linked to a barcode for multiplexing for the latter  
 211 nucleotide wobbles: M = A+C, K = G+T, N = A+C+T+G, Y = C+T

212

213

214  
215  
216

**Table S2.** Sequences and OTUs

|                           | Snottites<br>Ceiling | Subaerial<br>Top Wall | Submersed<br>Bottom Wall | Mineral<br>spring water | Mixed Cave<br>water |
|---------------------------|----------------------|-----------------------|--------------------------|-------------------------|---------------------|
| # Samples                 | 4                    | 2                     | 3                        | 3                       | 2                   |
| # Sequences<br>per sample | 2158 ± 504           | 2940 ± 60             | 2036 ± 206               | 2220 ± 164              | 2112 ± 582          |
| # OTUs per<br>sample      | 116 ± 11             | 138 ± 20              | 121 ± 7                  | 147 ± 10                | 92 ± 4              |
| Inverse<br>Simpson        | 17.9 ± 7.4           | 22.4 ± 2.1            | 10.2 ± 1.9               | 12.9 ± 3.5              | 6.5 ± 2.1           |
| Hill number<br>(exp(H))   | 32.1 ± 8.9           | 39.5 ± 6.4            | 21.5 ± 4.8               | 27.3 ± 5                | 12.8 ± 2.6          |

217 Given are mean values and IQR as variation

218  
219

220 **Supplementary Figure**

221  
222

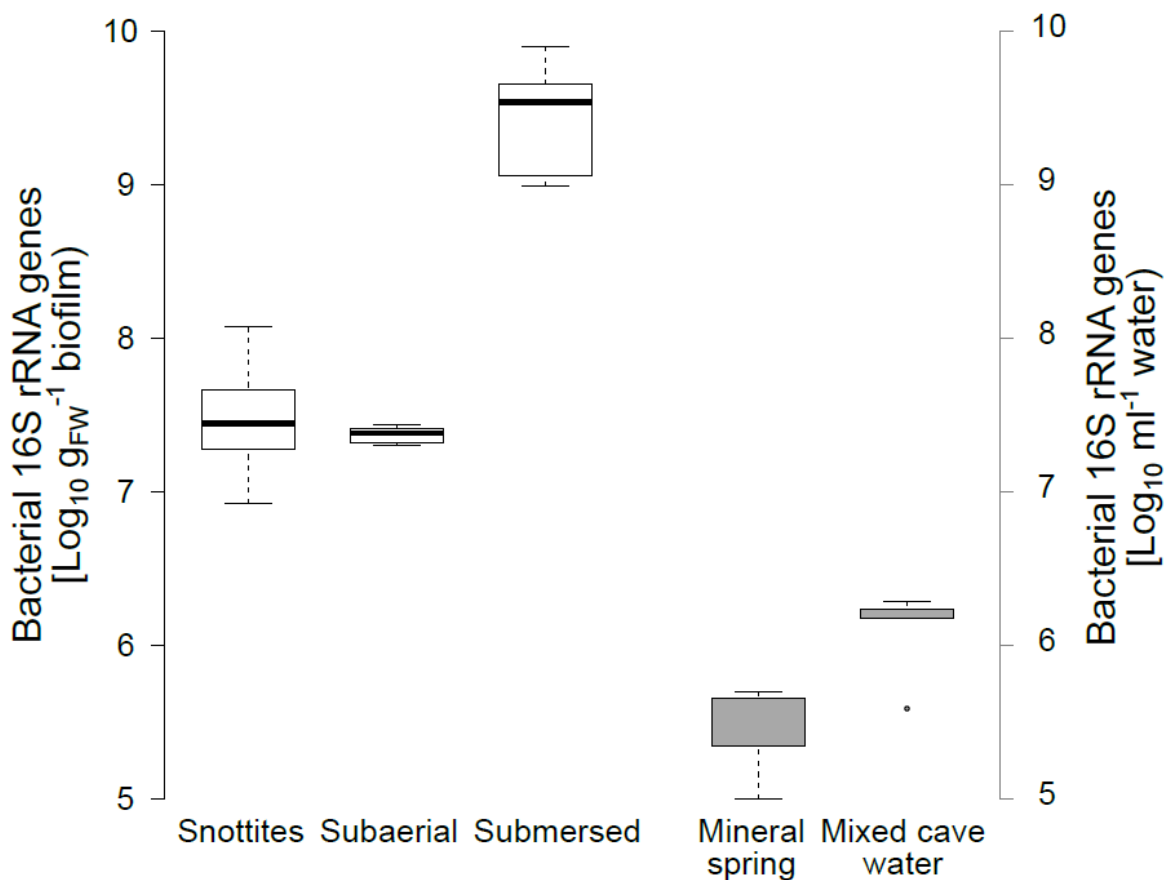

223  
224  
225  
226  
227  
228  
229

**Figure S1.** Quantitative PCR of biofilm samples reveal significant differences between submersed and subaerial biofilm compartments ( $t=-13.58$ ,  $df=29$ ,  $p<0.05$ ).
